# Supplementary material
Source: PubMed Central journal article supplement (PMC1621110)
Supplement: NIHMS2281-supplement-S1.pdf [file NIHMS2281-supplement-S1.pdf]

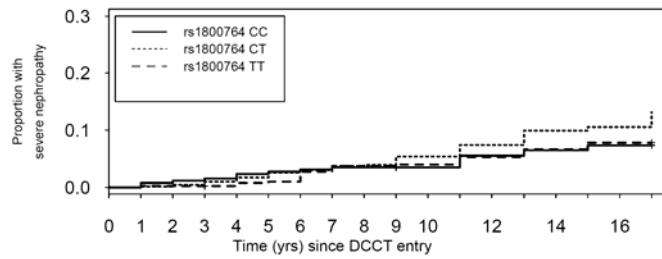

|              |     |     |     |     |     |     |     |     |     |     |     |     |     |
|--------------|-----|-----|-----|-----|-----|-----|-----|-----|-----|-----|-----|-----|-----|
| CC # at risk | 258 | 256 | 255 | 254 | 250 | 246 | 244 | 239 | 233 | 207 | 107 | 30  |     |
| CC # events  | 2   | 1   | 1   | 2   | 1   | 1   | 1   | 0   | 0   | 5   | 2   | 1   | 0   |
| CT # at risk | 698 | 697 | 695 | 690 | 680 | 663 | 651 | 640 | 639 | 620 | 559 | 264 | 103 |
| CT # events  | 1   | 2   | 4   | 5   | 6   | 3   | 5   | 1   | 10  | 13  | 15  | 2   | 3   |
| TT # at risk | 409 | 408 | 408 | 407 | 404 | 396 | 384 | 377 | 377 | 374 | 341 | 162 | 66  |
| TT # events  | 1   | 0   | 0   | 2   | 1   | 7   | 4   | 0   | 1   | 5   | 5   | 2   | 0   |

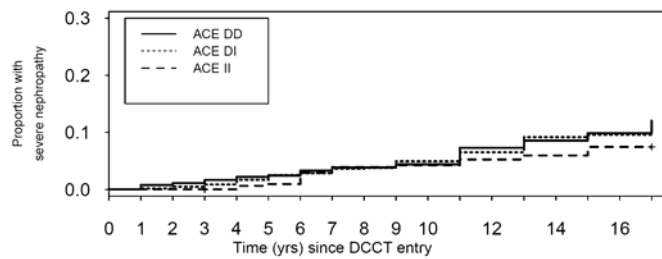

|              |     |     |     |     |     |     |     |     |     |     |     |     |     |
|--------------|-----|-----|-----|-----|-----|-----|-----|-----|-----|-----|-----|-----|-----|
| DD # at risk | 369 | 366 | 365 | 362 | 358 | 354 | 348 | 340 | 340 | 332 | 288 | 138 | 42  |
| DD # events  | 3   | 1   | 2   | 2   | 1   | 3   | 2   | 0   | 2   | 10  | 4   | 2   | 1   |
| DI # at risk | 680 | 679 | 677 | 674 | 664 | 646 | 636 | 626 | 625 | 608 | 558 | 271 | 105 |
| DI # events  | 1   | 2   | 3   | 5   | 6   | 2   | 5   | 1   | 8   | 10  | 16  | 1   | 2   |
| II # at risk | 316 | 316 | 316 | 315 | 312 | 305 | 295 | 290 | 290 | 287 | 261 | 124 | 52  |
| II # events  | 0   | 0   | 0   | 2   | 1   | 6   | 3   | 0   | 1   | 3   | 2   | 2   | 0   |

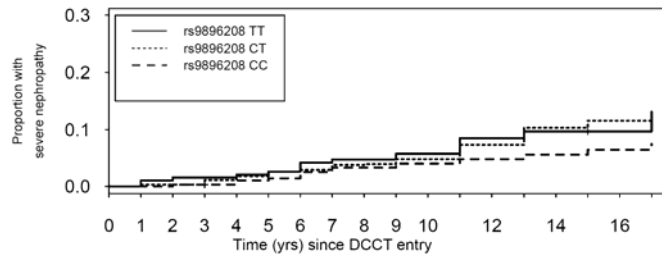

|              |     |     |     |     |     |     |     |     |     |     |     |     |    |
|--------------|-----|-----|-----|-----|-----|-----|-----|-----|-----|-----|-----|-----|----|
| CC # at risk | 560 | 560 | 558 | 557 | 551 | 537 | 524 | 518 | 518 | 506 | 465 | 234 | 89 |
| CC # events  | 0   | 2   | 0   | 4   | 2   | 6   | 4   | 0   | 4   | 4   | 4   | 2   | 1  |
| CT # at risk | 612 | 610 | 610 | 604 | 595 | 582 | 574 | 560 | 559 | 547 | 488 | 227 | 84 |
| CT # events  | 2   | 0   | 5   | 4   | 5   | 2   | 5   | 1   | 5   | 14  | 16  | 3   | 1  |
| TT # at risk | 193 | 191 | 190 | 190 | 188 | 186 | 181 | 178 | 178 | 174 | 154 | 72  | 26 |
| TT # events  | 2   | 1   | 0   | 1   | 1   | 3   | 1   | 0   | 2   | 5   | 2   | 0   | 1  |

**Figure A1: Cumulative Incidence of Severe Nephropathy according to ACE Genotype.** The time was calculated from DCCT baseline to the first timed AER collection greater than 208 $\mu$ g/minute or renal replacement therapy (dialysis or transplant) in an individual with persistent microalbuminuria in the DCCT or EDIC follow up periods. Subjects were categorized according to genotypes at the three ACE polymorphisms: rs1800764, InDel, rs9896208. For univariate analysis see Table 2.
