# Supplementary material
Source: PubMed Central journal article supplement (PMC1621110)
Supplement: NIHMS2281-supplement-S2.pdf [file NIHMS2281-supplement-S2.pdf]

| Variable                                                                |                     | Total | Persistent Microalbuminuria |                 |         |
|-------------------------------------------------------------------------|---------------------|-------|-----------------------------|-----------------|---------|
|                                                                         |                     |       | Events                      | Censored        | P-value |
| <b>Total Cohort</b>                                                     |                     | 1299  | 246                         | 1053            |         |
| <b>Gender</b>                                                           | <b>Male</b>         | 681   | 147                         | 534             | 0.006   |
|                                                                         | <b>Female</b>       | 618   | 99                          | 519             |         |
| <b>DCCT treatment</b>                                                   | <b>Intensive</b>    | 636   | 79                          | 557             | <0.0001 |
|                                                                         | <b>Conventional</b> | 663   | 167                         | 496             |         |
| <b>Cohort</b>                                                           | <b>Primary</b>      | 681   | 96                          | 585             | 0.0002  |
|                                                                         | <b>Secondary</b>    | 618   | 150                         | 468             |         |
| <b>Any use of ACE-I during EDIC</b>                                     | <b>Yes</b>          | 374   | 148                         | 226             | <0.0001 |
|                                                                         | <b>No</b>           | 925   | 98                          | 827             |         |
| <b>Use of ACE-I prior to event/censor</b>                               | <b>Yes</b>          | 167   | 9                           | 159             | 0.005   |
|                                                                         | <b>No</b>           | 925   | 98                          | 827             |         |
| <b>Any use of anti-hypertensives other than ACE-I during EDIC</b>       | <b>Yes</b>          | 98    | 37                          | 61              | <0.0001 |
|                                                                         | <b>No</b>           | 1201  | 209                         | 992             |         |
| <b>Use of anti-hypertensives other than ACE-I prior to event/censor</b> | <b>Yes</b>          | 66    | 7                           | 59              | 0.06    |
|                                                                         | <b>No</b>           | 1201  | 209                         | 992             |         |
| <b>Age at diagnosis (yrs)</b>                                           |                     | 1299  | 19.2<br>(8.8)               | 22.0<br>(7.8)   | 0.0001  |
| <b>Age at baseline (yrs)</b>                                            |                     | 1299  | 25.4<br>(7.9)               | 27.2<br>(6.9)   | 0.002   |
| <b>Type 1 diabetes duration (yrs)</b>                                   |                     | 1299  | 6.3<br>(4.1)                | 5.3<br>(4.1)    | 0.02    |
| <b>HbA1c at eligibility (%)</b>                                         |                     | 1299  | 9.6<br>(1.7)                | 8.9<br>(1.5)    | <0.0001 |
| <b>BMI (kg/m<sup>2</sup>)</b>                                           |                     | 1299  | 23.7<br>(3.1)               | 23.3<br>(2.7)   | 0.04    |
| <b>Mean Arterial Pressure (mmHg)</b>                                    |                     | 1299  | 87.7<br>(8.0)               | 86<br>(8.9)     | 0.01    |
| <b>Total Cholesterol (mg/dl)</b>                                        |                     | 1299  | 177.2<br>(33.5)             | 175.6<br>(33.4) | 0.23    |
| <b>HDL Cholesterol (mg/dl)</b>                                          |                     | 1299  | 48.8<br>(11.8)              | 50.9<br>(12.4)  | 0.09    |
| <b>Triglycerides (mg/dl)</b>                                            |                     | 1299  | 94.7<br>(60.0)              | 77.2<br>(43.9)  | <0.0001 |
| <b>AER (µg/min)</b>                                                     |                     | 1299  | 13.4<br>(12.4)              | 8.4<br>(8.0)    | <0.0001 |

**Table A1: Association of DCCT baseline variables and use of anti-hypertension medication with the risk of development of persistent microalbuminuria.** Counts or means (standard deviation) of each variable are provided for subjects who develop persistent microalbuminuria and for those who are censored by EDIC year 8. P-values correspond to likelihood ratio tests (1df) from univariate Cox proportional hazards (PH) models for each variable. PH models were stratified by the year of entry into the DCCT and a log transformation was applied to normalize the following variables: eligibility HbA1c, BMI, total cholesterol, HDL cholesterol, triglycerides and AER.
