# Supplementary material
Source: PubMed Central journal article supplement (PMC1621110)
Supplement: NIHMS2281-supplement-S3.pdf [file NIHMS2281-supplement-S3.pdf]

| Variable                                                             |                     | Total | Severe Nephropathy |                 |         |
|----------------------------------------------------------------------|---------------------|-------|--------------------|-----------------|---------|
|                                                                      |                     |       | Events             | Censored        | P-value |
| <b>Total Cohort</b>                                                  |                     | 1365  | 115                | 1250            |         |
| <b>Gender</b>                                                        | <b>Male</b>         | 717   | 76                 | 641             | 0.001   |
|                                                                      | <b>Female</b>       | 648   | 39                 | 609             |         |
| <b>DCCT treatment</b>                                                | <b>Intensive</b>    | 671   | 23                 | 648             | <0.0001 |
|                                                                      | <b>Conventional</b> | 694   | 92                 | 602             |         |
| <b>Cohort</b>                                                        | <b>Primary</b>      | 686   | 36                 | 650             | 0.0009  |
|                                                                      | <b>Secondary</b>    | 679   | 79                 | 600             |         |
| <b>Any use of ACE-I during EDIC</b>                                  | <b>Yes</b>          | 408   | 96                 | 312             | <0.0001 |
|                                                                      | <b>No</b>           | 957   | 19                 | 938             |         |
| <b>Use of ACE-I prior to event/censor</b>                            | <b>Yes</b>          | 247   | 19                 | 228             | 0.0002  |
|                                                                      | <b>No</b>           | 957   | 19                 | 938             |         |
| <b>Any use of anti-hypertensives other than ACE-I during EDIC</b>    | <b>Yes</b>          | 111   | 26                 | 85              | <0.0001 |
|                                                                      | <b>No</b>           | 1254  | 89                 | 1165            |         |
| <b>Use of anti-hypertensives other than ACE-I prior event/censor</b> | <b>Yes</b>          | 91    | 9                  | 82              | 0.52    |
|                                                                      | <b>No</b>           | 1254  | 89                 | 1165            |         |
| <b>Age at diagnosis (yrs)</b>                                        |                     | 1365  | 19.1<br>(8.6)      | 21.4<br>(8.0)   | 0.07    |
| <b>Age at baseline (yrs)</b>                                         |                     | 1365  | 26.0<br>(7.7)      | 26.9<br>(7.0)   | 0.40    |
| <b>Type 1 diabetes duration (yrs)</b>                                |                     | 1365  | 6.9<br>(3.9)       | 5.5<br>(4.2)    | 0.02    |
| <b>HbA1c at eligibility (%)</b>                                      |                     | 1365  | 10.1<br>(1.8)      | 8.9<br>(1.6)    | <0.0001 |
| <b>BMI (kg/m<sup>2</sup>)</b>                                        |                     | 1365  | 24.0<br>(2.9)      | 23.3<br>(2.8)   | 0.006   |
| <b>Mean Arterial Pressure (mmHg)</b>                                 |                     | 1365  | 88.4<br>(7.8)      | 86.3<br>(8.8)   | 0.02    |
| <b>Total Cholesterol (mg/dl)</b>                                     |                     | 1365  | 181.8<br>(30.7)    | 175.8<br>(33.5) | 0.03    |
| <b>HDL Cholesterol (mg/dl)</b>                                       |                     | 1365  | 47.2<br>(12.2)     | 50.7<br>(12.2)  | 0.007   |
| <b>Triglycerides (mg/dl)</b>                                         |                     | 1365  | 107.3<br>(73.2)    | 79.4<br>(44.5)  | <0.0001 |
| <b>AER (µg/min)</b>                                                  |                     | 1365  | 18.5<br>(20.8)     | 10.3<br>(11.7)  | <0.0001 |

**Table A2: Association of DCCT baseline variables and use of anti-hypertension medication with the risk of development of severe nephropathy.** Counts or means (standard deviation) of each variable are provided for subjects who develop severe nephropathy and for those who are censored by EDIC year 8. P-values correspond to likelihood ratio tests (1df) from univariate Cox proportional hazards (PH) models for each variable. PH models were stratified by the year of entry into the DCCT and a log transformation was applied to normalize the following variables: eligibility HbA1c, BMI, total cholesterol, HDL cholesterol, triglycerides and AER.
